# Supplementary material for: Mycobacterium avium subsp. paratuberculosis antigens induce cellular immune responses in cattle without causing reactivity to tuberculin in the tuberculosis skin test
Source: Front Immunol. 2023 Jan 18;13:1087015. doi: 10.3389/fimmu.2022.1087015 (PMC9889921; doi:10.3389/fimmu.2022.1087015)
Supplement: Supplementary file 2 [file DataSheet_2.xlsx]

## Sheet: Design Details
	nCounter PlexSet Design Details
	Customer Name	Accession	Position	Target Sequence	A Tm	B Tm	Flags	HUGO Gene	Species	NSID	Tag	Design Remarks
	GUSB	NM_001083436.1	1815-1914	GATTTCATGACTAACCAGTCACCAGTTCGGATGATTGGGAACAGAAAAGGGATCTTCACTCGGCAGAGACAACCAAAGAGTGCAGCTTTCCTGTTGCGAG	81	84	HK	GUSB	Bos taurus	NM_001083436.1:1814	T001
	RPL15	NM_001077866.1	554-653	CCGCGGCCTGGGCAAGGGTCACAAGTTCCACCACACTATTGGTGGCTCTCGCCGCGCAGCGTGGAGAAGGCGCAATACTCTCCAGCTCCACCGCTACCGC	91	92	HK;X	RPL15	Bos taurus	NM_001077866.1:553	T002	also targets predicted RPL15 pseudogenes, LOC101903301 and LOC101902860 @ >96%
	YWHAZ	NM_174814.2	147-246	CAAGGAGCTGAATTATCCAATGAGGAGAGGAATCTTCTCTCAGTTGCTTATAAAAATGTTGTAGGAGCCCGTAGGTCATCTTGGAGGGTCGTCTCCAGTA	80	81	HK	YWHAZ	Bos taurus	NM_174814.2:146	T003
	ITGAM	NM_001039957.1	1179-1278	CAGGATAGATTCAGACATGAATGATGCTTACTTGGGTTATGCTGCCGAAGTCACCTTGCGGAACCGGGTGCAACACCTGTTTCTGGGAGCACCTCGATAT	81	85		ITGAM	Bos taurus	NM_001039957.1:1178	T004
	PTGS2	NM_174445.2	1747-1846	CACTGCCTCAATTCAGTCTCTCATCTGCAGTAACGTGAAAGGCTGTCCCTTTACCTCATTCAGTGTTCAAGATACGCACCTCACCAAAACGGTCACCATT	83	79		PTGS2	Bos taurus	NM_174445.2:1746	T005
	TLR2	NM_174197.2	1498-1597	GCCAGGAAAAATGAAACAGCTGAACTTATCCAGCACAAGGATACACAGTTTAACCCAGTGCCTTCCCCAGACCCTGGAAATTTTAGATGTTAGCAATAAC	86	81		TLR2	Bos taurus	NM_174197.2:1497	T006
	TLR4	NM_174198.6	2641-2740	TCCAGGAGGGTTTCCACAAAAGCCGTAAGGTTATTGTCGTGGTGTCCCAGCACTTCATCCAGAGCCGATGGTGTATCTTCGAGTATGAGATTGCCCAGAC	82	82		TLR4	Bos taurus	NM_174198.6:2640	T007
	IL1B	NM_174093.1	331-430	TGACCTGAGGAGCATCCTTTCATTCATCTTTGAAGAAGAGCCTGTCATCTTCGAAACGTCCTCCGACGAGTTTCTGTGTGACGCACCCGTGCAGTCAATA	80	82		IL1B	Bos taurus	NM_174093.1:330	T008
	IL6	NM_173923.2	320-419	CAAAAATGGAGGAAAAGGACGGATGCTTCCAATCTGGGTTCAATCAGGCGATTTGCTTGATCAGAACCACTGCTGGTCTTCTGGAGTATCAGATATACCT	85	80		IL6	Bos taurus	NM_173923.2:319	T009
	IL12B	NM_174356.1	875-974	AAACCTCAGCCAAAGTCACATGCCACAAGGATGCCAACGTCCGCGTGCAAGCCCGGGACCGCTACTACAGCTCATTCTGGAGTGAATGGGCATCTGTGTC	85	86		IL12B	Bos taurus	NM_174356.1:874	T010
	TGFb	NM_001166068.1	962-1061	CTGACCCGCAGAGAGGAAATAGAGGGCTTTCGCCTCAGTGCCCACTGTTCCTGTGACAGTAAAGATAACACGCTTCAAGTGGACATTAACGGGTTCAGTT	86	79		TGFB1	Bos taurus	NM_001166068.1:961	T011
	IL10	NM_174088.1	145-244	GGCGAGGCGAAGACTTTCTTTCAAATGAAGGACCAACTGCACAGCTTACTGTTGACCCAGTCTCTGCTGGATGACTTTAAGGGTTACCTGGGTTGCCAAG	85	84		IL10	Bos taurus	NM_174088.1:144	T012
	IL-22	NM_001098379.1	389-488	CCAATCTGACAAATTCCACCCCTATATGGAAAAGGTGGTGCCCTTCTTCTCCAGGCTCAGCAAAAAGCTAAGCCAATGTCATGTTGAGTCTGACAACCAG	82	86		IL22	Bos taurus	NM_001098379.1:388	T013
	PTX3	NM_001076259.1	719-818	TGCCTGCATTTGGGTCAAAGCCACAGAAGTATTAAACAAAACAGTCCTGTTTTCTTATGGCACAAAGAGGAATCCATATGAGATCCAGCTGTACCTCAGC	82	82		PTX3	Bos taurus	NM_001076259.1:718	T014
	CD40	NM_001105611.2	415-514	CTTGTGTCTCCCTGGCTTCGGGGTCAAGCAGATCGCTACAGGGCTTTTGGATACCGTCTGTGAACCCTGCCCGCTCGGCTTCTTCTCCAACGTGTCATCT	84	84		CD40	Bos taurus	NM_001105611.2:414	T015
	CD40LG	NM_174624.2	609-708	AGTGGATCAGAGAGAATCTTACTGAGAGCTGCAAACACCCACAGTTCTTCCAAACCATGCGGGCAGCAATCCATTCACTTAGGAGGAGTCTTTGAATTGC	85	82		CD40LG	Bos taurus	NM_174624.2:608	T016
	CD86	NM_001038017.2	720-819	AAACAAATGTGACCATATTCTGTGCCCTGCAACTTGAGCCAACGAAGATAATTTTATCCCAACCTTACAATATAGATGCAAAGTCACCTGTGCCAAGCCC	83	80		CD86	Bos taurus	NM_001038017.2:719	T017
	CTLA4	NM_174297.1	36-135	GTGGACATCTAGGACCTGGCCCTGCACTGCCCTATTTTTTCTTGTCTTCATTCCTGTTTTCTCTAAAGGGATGAATGTGACCCAGCCTCCAGTGGTGCTG	80	83		CTLA4	Bos taurus	NM_174297.1:35	T018
	PDCD1	NM_001083506.1	321-420	TGCCCGATGGGCAGCAGTTTAACATGAGCATCGTGGCGGCCCAGCGCAATGACAGCGGCGTCTACTTCTGCGGGGCCATCTACCTGCCACCCCGGACGCA	84	86		PDCD1	Bos taurus	NM_001083506.1:320	T019
	PDL1	NM_001163412.1	394-493	TACTGTTGCTTGATCAGCTATGGCGGTGCCGACTACAAGCGGATTACTTTGAAAGTCAACGCTCCATACCGCAAAATCTACCATACAATTTCTGTGGATC	82	79		CD274	Bos taurus	NM_001163412.1:393	T020
	IL2	NM_180997.2	218-317	CAGGATGCATACATTTGACTTTTACGTGCCCAAGGTTAACGCTACAGAATTGAAACATCTTAAGTGTTTACTAGAAGAACTCAAACTTCTAGAGGAAGTG	78	77		IL2	Bos taurus	NM_180997.2:217	T021
	IFNG	NM_174086.1	503-602	TCAAAGTGATGAATGACCTGTCACCAAAATCTAACCTCAGAAAGCGGAAGAGAAGTCAGAATCTCTTTCGAGGCCGGAGAGCATCAACGTAATGGTCCTC	84	84		IFNG	Bos taurus	NM_174086.1:502	T022
	IL17A	NM_001008412.1	148-247	TCCAGGCTGCCCACCTACTGAGGACAAGAACTTCCCACAGCATGTGAGGGTCAACCTAAACATCGTTAACCGGAGCACAAACTCCAGAAGGCCCACCGAT	88	88		IL17A	Bos taurus	NM_001008412.1:147	T023
	IL4	NM_173921.2	336-435	GGGCGGACTTGACAGGAATCTCAACAGCTTGGCAAGCAAGACCTGTTCTGTGAATGAAGCCAAGACGAGCACAAGTACGCTGAAAGACCTCTTGGAAAGG	88	86		IL4	Bos taurus	NM_173921.2:335	T024

## Sheet: Isoform Coverage
	nCounter PlexSet Isoform Coverage
	Customer Name	HUGO Gene	Probe NSID	Tot Isoforms	Isoforms Hit By Probe	# Hit	Isoforms Not Hit By Probe	# Not Hit
	PDL1	CD274	NM_001163412.1:393	6	XM_019965989.1;NM_001163412.1;XM_005209965.3;XM_019965988.1;XM_019965990.1;XM_010807832.2	6		0
	CD40	CD40	NM_001105611.2:414	6	XM_005214504.3;NM_001105611.2;XM_010811368.2;XM_019972505.1;XM_019972507.1;XM_015474118.1	6		0
	CD40LG	CD40LG	NM_174624.2:608	2	XM_019956469.1;NM_174624.2	2		0
	CD86	CD86	NM_001038017.2:719	9	NM_001038017.2;XM_019955312.1;XM_019955380.1;XM_019955063.1;XM_019955145.1;XM_005201386.3;XM_005201387.3;XM_019954979.1;XM_019955230.1	9		0
	CTLA4	CTLA4	NM_174297.1:35	4	NM_174297.1;XM_005202600.3;XM_019975542.1;XM_019975550.1	4		0
	GUSB	GUSB	NM_001083436.1:1814	2	NM_001083436.1	1	XM_019987160.1	1
	IFNG	IFNG	NM_174086.1:502	2	XM_019960052.1;NM_174086.1	2		0
	IL10	IL10	NM_174088.1:144	2	NM_174088.1;XM_019976984.1	2		0
	IL12B	IL12B	NM_174356.1:874	4	XM_010807562.2;NM_174356.1;XM_005209679.3;XM_019963681.1	4		0
	IL17A	IL17A	NM_001008412.1:147	2	NM_001008412.2;XM_019985472.1	2		0
	IL1B	IL1B	NM_174093.1:330	2	XM_019970254.1;NM_174093.1	2		0
	IL2	IL2	NM_180997.2:217	2	NM_180997.2;XM_019977150.1	2		0
	IL-22	IL22	NM_001098379.1:388	2	NM_001098379.1;XM_019960050.1	2		0
	IL4	IL4	NM_173921.2:335	2	NM_173921.2;XM_019963604.1	2		0
	IL6	IL6	NM_173923.2:319	3	XM_019959556.1;XM_015468553.1;NM_173923.2	3		0
	ITGAM	ITGAM	NM_001039957.1:1178	3	NM_001039957.1;XM_010819391.2;XM_005224843.3	3		0
	PDCD1	PDCD1	NM_001083506.1:320	4	NM_001083506.1;XM_019958076.1;XM_019958075.1;XM_010803904.2	4		0
	PTGS2	PTGS2	NM_174445.2:1746	5	XM_010813540.2;XM_015475265.1;XM_019976900.1;NM_174445.2;XM_010813539.2	5		0
	PTX3	PTX3	NM_001076259.1:718	2	XM_019960356.1;NM_001076259.2	2		0
	RPL15	RPL15	NM_001077866.1:553	4	NM_001077866.1;XM_005226176.1	2	XM_019953402.1;XM_019953401.1	2
	TGFb	TGFB1	NM_001166068.1:961	2	NM_001166068.1;XM_019980009.1	2		0
	TLR2	TLR2	NM_174197.2:1497	9	XM_005217446.3;XM_005217447.3;XM_015475329.1;XM_019978018.1;XM_015475330.1;XM_019978020.1;XM_019978019.1;XM_015475328.1;NM_174197.2	9		0
	TLR4	TLR4	NM_174198.6:2640	4	XM_019966824.1;XM_019966825.1;NM_174198.6;XM_005210586.3	4		0
	YWHAZ	YWHAZ	NM_174814.2:146	2	XM_019973801.1;NM_174814.2	2		0

## Sheet: ProbeA
WellPosition	Name	Sequence	Comments
A01	NM_001083436.1:1814_T001	CCTTTTCTGTTCCCAATCATCCGAACTGGTGACTGGTTAGTCATGAAATCCCTCAAGACCTAAGCGACAGCGTGACCTTGTTTCA	GUSB
A02	NM_001077866.1:553_T002	GAGAGCCACCAATAGTGTGGTGGAACTTGTGACCCTTGCCCAGGCCGCGGCATCCTCTTCTTTTCTTGGTGTTGAGAAGATGCTC	RPL15
A03	NM_174814.2:146_T003	TAAGCAACTGAGAGAAGATTCCTCTCCTCATTGGATAATTCAGCTCCTTGCACAATTCTGCGGGTTAGCAGGAAGGTTAGGGAAC	YWHAZ
A04	NM_001039957.1:1178_T004	CTTCGGCAGCATAACCCAAGTAAGCATCATTCATGTCTGAATCTATCCTGCTGTTGAGATTATTGAGCTTCATCATGACCAGAAG	ITGAM
A05	NM_174445.2:1746_T005	AGGGACAGCCTTTCACGTTACTGCAGATGAGAGACTGAATTGAGGCAGTGCAAAGACGCCTATCTTCCAGTTTGATCGGGAAACT	PTGS2
A06	NM_174197.2:1497_T006	AACTGTGTATCCTTGTGCTGGATAAGTTCAGCTGTTTCATTTTTCCTGGCCGAACCTAACTCCTCGCTACATTCCTATTGTTTTC	TLR2
A07	NM_174198.6:2640_T007	CTGGGACACCACGACAATAACCTTACGGCTTTTGTGGAAACCCTCCTGGACCAATTTGGTTTTACTCCCCTCGATTATGCGGAGT	TLR4
A08	NM_174093.1:330_T008	AGATGACAGGCTCTTCTTCAAAGATGAATGAAAGGATGCTCCTCAGGTCACTTTCGGGTTATATCTATCATTTACTTGACACCCT	IL1B
A09	NM_173923.2:319_T009	CGCCTGATTGAACCCAGATTGGAAGCATCCGTCCTTTTCCTCCATTTTTGCAACAGCCACTTTTTTTCCAAATTTTGCAAGAGCC	IL6
A10	NM_174356.1:874_T010	TTGCACGCGGACGTTGGCATCCTTGTGGCATGTGACTTTGGCACCGTGTGGACGGCAACTCAGAGATAACGCATAT	IL12B
A11	NM_001166068.1:961_T011	GAACAGTGGGCACTGAGGCGAAAGCCCTCTATTTCCTCTCTGCGGCCTGGAGTTTATGTATTGCCAACGAGTTTGTCTTT	TGFb
A12	NM_174088.1:144_T012	AGTAAGCTGTGCAGTTGGTCCTTCATTTGAAAGAAAGTCTTCGCCTCGCCCAGATAAGGTTGTTATTGTGGAGGATGTTACTACA	IL10
B01	NM_001098379.1:388_T013	AGAAGAAGGGCACCACCTTTTCCATATAGGGGTGGAATTTGTCAGATTGGCTTCCTTCCTGTGTTCCAGCTACAAACTTAGAAAC	IL-22
B02	NM_001076259.1:718_T014	ACAGGACTGTTTTGTTTAATACTTCTGTGGCTTTGACCCAAATGCAGGCACATAAAATTGGTTTTGCCTTTCAGCAATTCAACTT	PTX3
B03	NM_001105611.2:414_T015	CCAAAAGCCCTGTAGCGATCTGCTTGACCCCGAAGCCAGGGAGACACAAGCTGGTCAAGACTTGCATGAGGACCCGCAAATTCCT	CD40
B04	NM_174624.2:608_T016	GAAGAACTGTGGGTGTTTGCAGCTCTCAGTAAGATTCTCTCTGATCCACTCTTTCGTTGGGACGCTTGAAGCGCAAGTAGAAAAC	CD40LG
B05	NM_001038017.2:719_T017	TATCTTCGTTGGCTCAAGTTGCAGGGCACAGAATATGGTCACATTTGTTTCCAGCAGACCTGCAATATCAAAGTTATAAGCGCGT	CD86
B06	NM_174297.1:35_T018	TGAAGACAAGAAAAAATAGGGCAGTGCAGGGCCAGGTCCTAGATGTCCACCCTGCCAATGCACTCGATCTTGTCATTTTTTTGCG	CTLA4
B07	NM_001083506.1:320_T019	ATTGCGCTGGGCCGCCACGATGCTCATGTTAAACTGCTGCCAAACTGGAGAGAGAAGTGAAGACGATTTAACCCA	PDCD1
B08	NM_001163412.1:393_T020	AAAGTAATCCGCTTGTAGTCGGCACCGCCATAGCTGATCAAGCAACAGTACGATTGCTGCATTCCGCTCAACGCTTGAGGAAGTA	PDL1
B09	NM_180997.2:217_T021	ATTCTGTAGCGTTAACCTTGGGCACGTAAAAGTCAAATGTATGCATCCTGCTGAGGCTGTTAAAGCTGTAGCAACTCTTCCACGA	IL2
B10	NM_174086.1:502_T022	CTTCCGCTTTCTGAGGTTAGATTTTGGTGACAGGTCATTCATCACTTTGACTAGGACGCAAATCACTTGAAGAAGTGAAAGCGAG	IFNG
B11	NM_001008412.1:147_T023	CCCTCACATGCTGTGGGAAGTTCTTGTCCTCAGTAGGTGCCACGCGATGACGTTCGTCAAGAGTCGCATAATCT	IL17A
B12	NM_173921.2:335_T024	CAGGTCTTGCTTGCCAAGCTGTTGAGATTCCTGTCAAGTCCGCCATTTGGAATGATGTGTACTGGGAATAAGACGACG	IL4

## Sheet: ProbeB
WellPosition	Name	Sequence	Comments
A01	NM_001083436.1:1814_ProbeB	CGAAAGCCATGACCTCCGATCACTCCTCGCAACAGGAAAGCTGCACTCTTTGGTTGTCTCTGCCGAGTGAAGATC	GUSB
A02	NM_001077866.1:553_ProbeB	CGAAAGCCATGACCTCCGATCACTCTAGCGGTGGAGCTGGAGAGTATTGCGCCTTCTCCACGCTGCGCGGC	RPL15
A03	NM_174814.2:146_ProbeB	CGAAAGCCATGACCTCCGATCACTCTACTGGAGACGACCCTCCAAGATGACCTACGGGCTCCTACAACATTTTTA	YWHAZ
A04	NM_001039957.1:1178_ProbeB	CGAAAGCCATGACCTCCGATCACTCCTCCCAGAAACAGGTGTTGCACCCGGTTCCGCAAGGTGA	ITGAM
A05	NM_174445.2:1746_ProbeB	CGAAAGCCATGACCTCCGATCACTCAATGGTGACCGTTTTGGTGAGGTGCGTATCTTGAACACTGAATGAGGTAA	PTGS2
A06	NM_174197.2:1497_ProbeB	CGAAAGCCATGACCTCCGATCACTCGTTATTGCTAACATCTAAAATTTCCAGGGTCTGGGGAAGGCACTGGGTTA	TLR2
A07	NM_174198.6:2640_ProbeB	CGAAAGCCATGACCTCCGATCACTCGTCTGGGCAATCTCATACTCGAAGATACACCATCGGCTCTGGATGAAGTG	TLR4
A08	NM_174093.1:330_ProbeB	CGAAAGCCATGACCTCCGATCACTCTATTGACTGCACGGGTGCGTCACACAGAAACTCGTCGGAGGACGTTTCGA	IL1B
A09	NM_173923.2:319_ProbeB	CGAAAGCCATGACCTCCGATCACTCAGGTATATCTGATACTCCAGAAGACCAGCAGTGGTTCTGATCAAGCAAAT	IL6
A10	NM_174356.1:874_ProbeB	CGAAAGCCATGACCTCCGATCACTCTCACTCCAGAATGAGCTGTAGTAGCGGTCCCGGGC	IL12B
A11	NM_001166068.1:961_ProbeB	CGAAAGCCATGACCTCCGATCACTCAACTGAACCCGTTAATGTCCACTTGAAGCGTGTTATCTTTACTGTCACAG	TGFb
A12	NM_174088.1:144_ProbeB	CGAAAGCCATGACCTCCGATCACTCCTTGGCAACCCAGGTAACCCTTAAAGTCATCCAGCAGAGACTGGGTCAAC	IL10
B01	NM_001098379.1:388_ProbeB	CGAAAGCCATGACCTCCGATCACTCCTGGTTGTCAGACTCAACATGACATTGGCTTAGCTTTTTGCTGAGCCTGG	IL-22
B02	NM_001076259.1:718_ProbeB	CGAAAGCCATGACCTCCGATCACTCGCTGAGGTACAGCTGGATCTCATATGGATTCCTCTTTGTGCCATAAGAAA	PTX3
B03	NM_001105611.2:414_ProbeB	CGAAAGCCATGACCTCCGATCACTCAGATGACACGTTGGAGAAGAAGCCGAGCGGGCAGGGTTCACAGACGGTAT	CD40
B04	NM_174624.2:608_ProbeB	CGAAAGCCATGACCTCCGATCACTCGCAATTCAAAGACTCCTCCTAAGTGAATGGATTGCTGCCCGCATGGTTTG	CD40LG
B05	NM_001038017.2:719_ProbeB	CGAAAGCCATGACCTCCGATCACTCGGGCTTGGCACAGGTGACTTTGCATCTATATTGTAAGGTTGGGATAAAAT	CD86
B06	NM_174297.1:35_ProbeB	CGAAAGCCATGACCTCCGATCACTCCAGCACCACTGGAGGCTGGGTCACATTCATCCCTTTAGAGAAAACAGGAA	CTLA4
B07	NM_001083506.1:320_ProbeB	CGAAAGCCATGACCTCCGATCACTCAGGTAGATGGCCCCGCAGAAGTAGACGCCGCTGTC	PDCD1
B08	NM_001163412.1:393_ProbeB	CGAAAGCCATGACCTCCGATCACTCGATCCACAGAAATTGTATGGTAGATTTTGCGGTATGGAGCGTTGACTTTC	PDL1
B09	NM_180997.2:217_ProbeB	CGAAAGCCATGACCTCCGATCACTCCACTTCCTCTAGAAGTTTGAGTTCTTCTAGTAAACACTTAAGATGTTTCA	IL2
B10	NM_174086.1:502_ProbeB	CGAAAGCCATGACCTCCGATCACTCGAGGACCATTACGTTGATGCTCTCCGGCCTCGAAAGAGATTCTGACTTCT	IFNG
B11	NM_001008412.1:147_ProbeB	CGAAAGCCATGACCTCCGATCACTCATCGGTGGGCCTTCTGGAGTTTGTGCTCCGGTTAACGATGTTTAGGTTGA	IL17A
B12	NM_173921.2:335_ProbeB	CGAAAGCCATGACCTCCGATCACTCAGGTCTTTCAGCGTACTTGTGCTCGTCTTGGCTTCATTCACAGAA	IL4
